# Supplementary material for: Effect of Autologous Bone Marrow Derived Mesenchymal Stem Cells in Treatment of Rheumatoid Arthritis
Source: Research Square preprint supplement (doi:10.21203/rs.3.rs-1382007/v2), 2022-04-18
Supplement: Supplementary file 1 [file 506353a31b678947ea1e88d0.docx]

**Supplementary table 1:** **Complete blood picture of the studied groups**

|  | **RBC**  **(x 106/µL)** | **Hb**  **(g/dL)** | **Hct**  **(%)** | **MCV**  **(fL)** | **MCHC**  **(g%)** | **PLT**  **(x 103/µL)** | **WBC**  **(x 103/µL)** |
| --- | --- | --- | --- | --- | --- | --- | --- |
| **Group 1** | 6.02±0.09 | 13.39±0.19 | 34.0±0.65 | 55.2±0.61 | 39.5±1.36 | 561.8±30.22 | 10.21±0.89 |
| **Group 2** | 5.77±0.13 | 11.99±0.32 a | 33.45±1.12 | 58.04±1.61  a | 20.8±1.69  a | 999.3±55.13  a | 7.78±0.64  a |
| **Group 3** | 6.74±0.13  ab | 13.66±0.06 b | 34.98±0.11  b | 51.88±1.03 ab | 39.11±1.09  b | 518.2±44.08  ab | 9.8±0.98  ab |
| **Group 4** | 6.22±0.12  bc | 12.59±0.3 ac | 33.02±0.57  ac | 53.08±0.38 abc | 38.11±0.65 abc | 801.8±12.04  abc | 14.94±.89  abc |
| **Group 5** | 6.54±0.12  b | 14.24±0.21  abcd | 36.12±0.49  abcd | 54.38±0.59  abcd | 39.31±0.77  bd | 751±14.63  abcd | 13.08±0.45 abcd |
| **Group 6** | 5.99±0.15 cde | 13.08±0.16 bde | 33.17±0.58  ace | 55.91±1.12  bcd | 39.3±0.99  bd | 665.1±37.12  abcde | 9.66±0.41 abde |
| **Group 7** | 6.33±0.09  bf | 13.36±0.1  bdef | 34.32±0.38  bdef | 53.78±0.81  abcef | 39.13±0.87  bd | 661.8±20.35 abcde | 9.84±0.42 abde |
| **Group 8** | 6.5±0.06  bf | 14.11±0.09  abcdfg | 35.64±0.27  abcdfg | 55.38±0.21  bcdeg | 39.67±0.98  bd | 651±23.77  abcde | 15.26±0.99  abcefg |

Data are represented as mean ± SD and analyzed using ANOVA followed by LSD post-hoc test at *p* value <0.05, n=10 for each group. RBC; red blood cells count, Hb; hemoglobin, Hct; hematocrit value, MCV; mean corpuscular volume, MCHC; mean corpuscular hemoglobin concentration, PLT; platelet count, WBC; white blood cells count. Group 1; negative control group, group 2; CFA induced arthritic group, group 3; treated with MSCs, group 4; treated with Os, group 5; treated with HPE, group 6; treated with MSCs and Os, group 7; treated with MSCs and HPE, group 8; treated with MSCs, Os and HPE. Different letters in each column indicate a significant difference. a; statistical significant difference from negative control, b; statistical significant difference from positive control, c; statistical significant difference from the group treated with MSCs, d; statistical significant difference from the group treated with Os, e; statistical significant difference from the group treated with HPE, f; statistical significant difference from the group treated with MSCs and Os, g; statistical significant difference from the group treated with MSCs and HPE.

**Supplementary table 2: Serum levels of liver enzymes (ALT and AST), urea and uric acid in the studied groups**

|  | **ALT (U/L)** | **AST (U/L)** | **Urea (mmol/L)** | **Uric acid (µmol/L)** |
| --- | --- | --- | --- | --- |
| **Group 1** | 66.71±5.79 | 55.56±3.52 | 28.37±2.1 | 3.68±0.62 |
| **Group 2** | 143±20  a | 455±17  a | 38.48±3  a | 5.04±0.38  a |
| **Group 3** | 76±12.76  ab | 92.94±17.54  ab | 21.48±4.62  ab | 3.29±0.41  b |
| **Group 4** | 92.02±5.95  abc | 134.34±16.67  abc | 19.48±1.45  abc | 4.09±0.5  abc |
| **Group 5** | 88.64±4.4  abcd | 106.1±9.66  abcd | 26.12±3.14  abcd | 3.04±0.08  abd |
| **Group 6** | 107.25±17  abcde | 134.5±22.86  abce | 29.99±1.57  bcde | 3.82±0.35  bcde |
| **Group 7** | 94.88±18.8  abcef | 125.18±15.71  abcdef | 35.92±3  abcdef | 3.76±0.44  bcde |
| **Group 8** | 96.91±10.9  abce | 129.34±21.44  abcdef | 25.28±5.91  abcdfg | 3.86±0.14  bcde |

Data are represented as mean ± SD and analyzed using ANOVA followed by LSD post-hoc test at *p* value <0.05, n=10 for each group. ALT; alanine aminotransferase, AST; aspartate aminotransferase. Group 1; negative control group, group 2; CFA induced arthritic group, group 3; treated with MSCs, group 4; treated with Os, group 5; treated with HPE, group 6; treated with MSCs and Os, group 7; treated with MSCs and HPE, group 8; treated with MSCs, Os and HPE. Different letters in each column indicate a significant difference. a; statistical significant difference from negative control, b; statistical significant difference from positive control, c; statistical significant difference from the group treated with MSCs, d; statistical significant difference from the group treated with Os, e; statistical significant difference from the group treated with HPE, f; statistical significant difference from the group treated with MSCs and Os, g; statistical significant difference from the group treated with MSCs and HPE.

**Supplementary table** **3: Serum ESR1, ESR2 and cortisol in the studied groups**

|  | **ESR 1 (mm/h)** | **ESR 2 (mm/h)** | **Cortisol (nmol/L)** |
| --- | --- | --- | --- |
| **Group 1** | 6±0.82 | 10.8±0.92 | 5.25±0.36 |
| **Group 2** | 8.9±0.9  a | 14.5±0.96  a | 20.5±0.89  a |
| **Group 3** | 12±1  ab | 20.9±1.52  ab | 5.92±0.88  b |
| **Group 4** | 12.4±1.05  ab | 22.3±1.07  abc | 8.65±0.82  abc |
| **Group 5** | 10.3±1.16  abcd | 16.7±1.06  abcd | 6.45±0.68  abcd |
| **Group 6** | 10.5±1.08  abcd | 18.3±1.25  abcde | 8.3±0.82  abce |
| **Group 7** | 11.7±0.82  abef | 20.1±1.4  abdef | 3.13±0.36  abcdef |
| **Group 8** | 10.4±1.17  abcdg | 19.5±1.08  abde | 3.77±0.99  abcdeg |

Data are represented as mean ± SD and analyzed using ANOVA followed by LSD post-hoc test at *p* value <0.05, n=10 for each group. ESR; erythrocyte sedimentation rate. Group 1; negative control group, group 2; CFA induced arthritic group, group 3; treated with MSCs, group 4; treated with Os, group 5; treated with HPE, group 6; treated with MSCs and Os, group 7; treated with MSCs and HPE, group 8; treated with MSCs, Os and HPE. Different letters in each column indicate a significant difference. a; statistical significant difference from negative control, b; statistical significant difference from positive control, c; statistical significant difference from the group treated with MSCs, d; statistical significant difference from the group treated with Os, e; statistical significant difference from the group treated with HPE, f; statistical significant difference from the group treated with MSCs and Os, g; statistical significant difference from the group treated with MSCs and HPE.

**Supplementary table 4: Inflammatory cytokines IL-10, TNF-α and IL-6 in the studied groups**

|  | **IL-10 (pg/mL)** | **TNF-α (pg/mL)** | **IL-6 (pg/mL)** |
| --- | --- | --- | --- |
| **Group 1** | 27.18±1.75 | 33.44±1.13 | 30.67±0.81 |
| **Group 2** | 122.08±1.84  a | 148.88±3.18  a | 130.04±5.42  a |
| **Group 3** | 82.17±5.51  ab | 102.17±3.56  ab | 100.17±1.64  ab |
| **Group 4** | 62.24±2.67  abc | 74.2±4.96  abc | 81.69±3.75  abc |
| **Group 5** | 49.55±2.17  abcd | 59.18±1.69  abcd | 68.63±1.26  abcd |
| **Group 6** | 40.06±1.18  abcde | 50.13±1.63  abcde | 55.3±3.06  abcde |
| **Group 7** | 33.75±0.41  abcdef | 42.31±2.69  abcdef | 46.64±1.46  abcdef |
| **Group 8** | 28.03±0.49  bcdefg | 35.44±0.97  bcdefg | 39.82±0.29  abcdefg |

Data are represented as mean ± SD and analyzed using ANOVA followed by LSD post-hoc test at *p* value <0.05, n=10 for each group. IL-10; interleukin 10, TNF-α; tumor necrosis factor α, IL-6; interleukin 6. Group 1; negative control group, group 2; CFA induced arthritic group, group 3; treated with MSCs, group 4; treated with Os, group 5; treated with HPE, group 6; treated with MSCs and Os, group 7; treated with MSCs and HPE, group 8; treated with MSCs, Os and HPE. Different letters in each column indicate a significant difference. a; statistical significant difference from negative control, b; statistical significant difference from positive control, c; statistical significant difference from the group treated with MSCs, d; statistical significant difference from the group treated with Os, e; statistical significant difference from the group treated with HPE, f; statistical significant difference from the group treated with MSCs and Os, g; statistical significant difference from the group treated with MSCs and HPE.
